# Supplementary material for: Associations between Hunger and Psychological Outcomes: A Large-Scale Ecological Momentary Assessment Study
Source: MDPI journal article supplement (doi:10.3390/nu14235167), 2022-12-05
Supplement: s1 [file s1]

### Supplementary figures

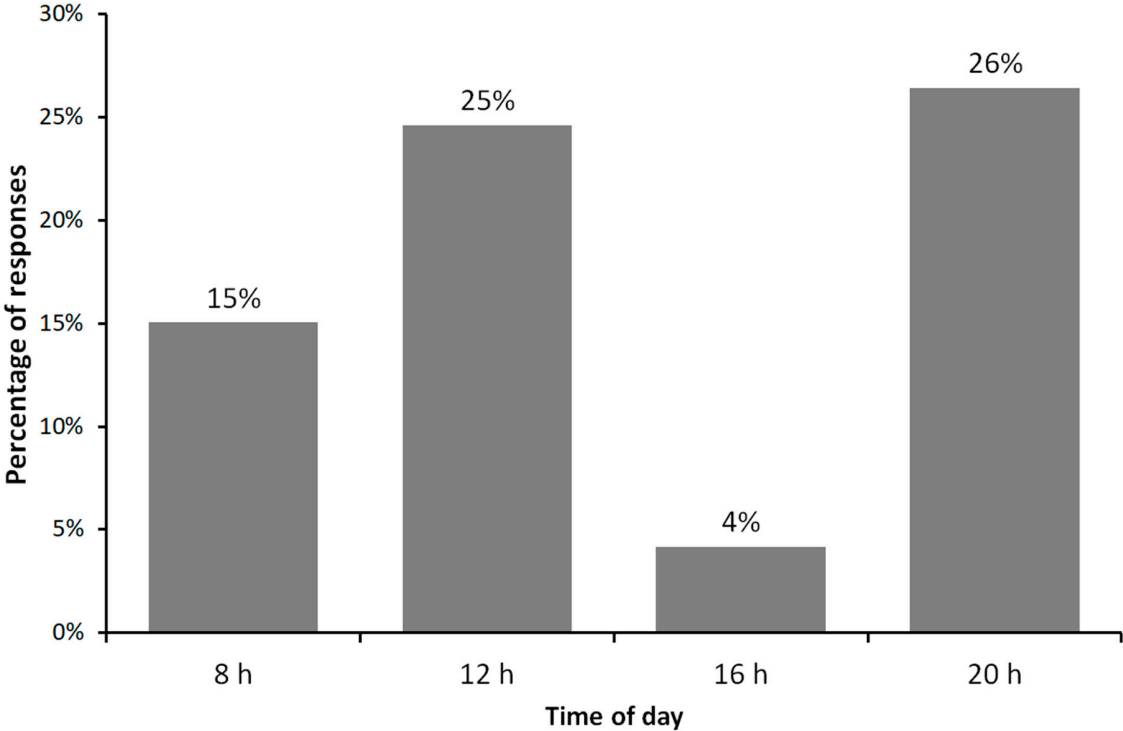

**Figure S1:** distribution of the responses currently eating according to day period, CoLaus | PsyCoLaus study, Lausanne, Switzerland, 2015-2017.

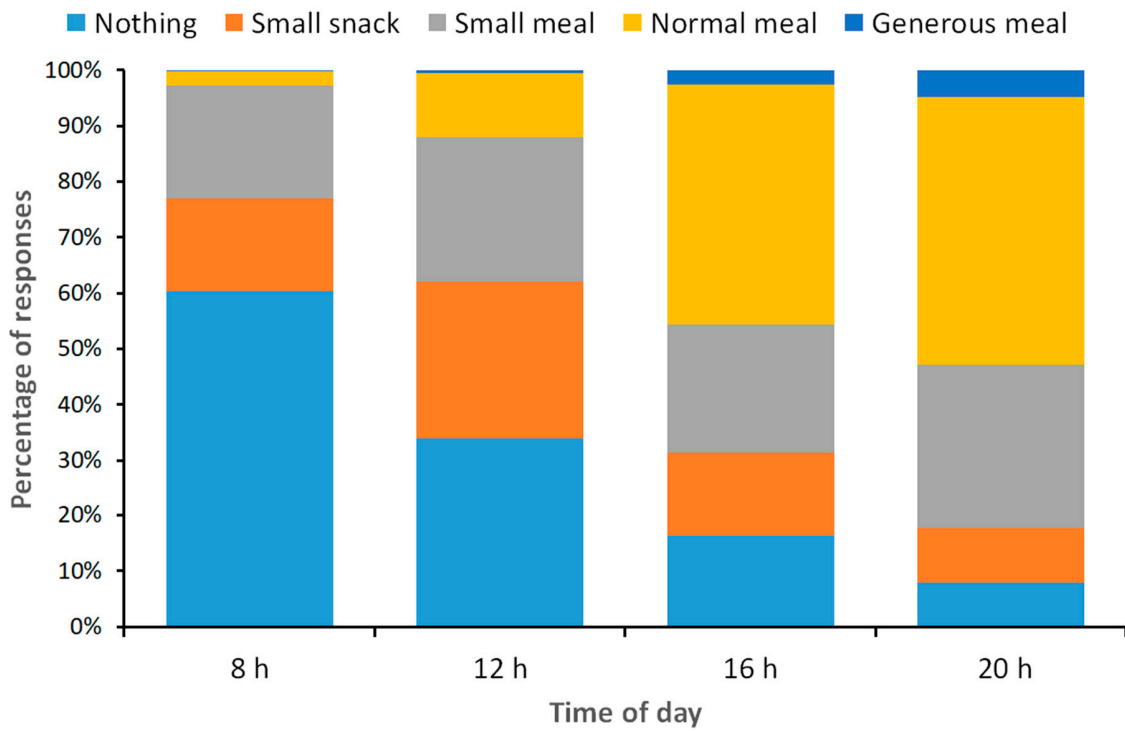

**Figure S2:** distribution of the responses regarding the type of meal consumed previously according to day period, CoLaus|PsyCoLaus study, Lausanne, Switzerland, 2015-2017.
