# Supplementary material for: Associations between Hunger and Psychological Outcomes: A Large-Scale Ecological Momentary Assessment Study
Source: MDPI journal article supplement (doi:10.3390/nu14235167), 2022-12-05
Supplement: s1 [file s1]

## Supplementary Tables

**Table S1:** levels of hunger and psychological states according to day period, CoLaus|PsyCoLaus study, Lausanne, Switzerland, 2015-2017.

|                    | <b>08:00</b> | <b>12:00</b> | <b>16:00</b> | <b>20:00</b> | <b>P-value</b> |
|--------------------|--------------|--------------|--------------|--------------|----------------|
| Hunger             | 2.37 ± 0.03  | 3.48 ± 0.03  | 1.70 ± 0.03  | 1.83 ± 0.03  | <0.001         |
| Sadness            | 2.68 ± 0.03  | 2.34 ± 0.03  | 2.39 ± 0.03  | 2.28 ± 0.03  | <0.001         |
| Anxiety            | 2.12 ± 0.03  | 2.08 ± 0.03  | 2.09 ± 0.03  | 1.91 ± 0.03  | <0.001         |
| Feeling active     | 3.27 ± 0.04  | 4.11 ± 0.04  | 4.06 ± 0.04  | 3.12 ± 0.04  | <0.001         |
| Feeling lively     | 4.23 ± 0.03  | 4.64 ± 0.03  | 4.46 ± 0.03  | 4.07 ± 0.03  | <0.001         |
| Feeling distracted | 3.08 ± 0.03  | 2.69 ± 0.03  | 2.73 ± 0.03  | 3.12 ± 0.03  | <0.001         |
| Anhedonia          | 1.64 ± 0.03  | 1.66 ± 0.03  | 1.67 ± 0.03  | 1.58 ± 0.03  | <0.001         |
| Anger              | 3.10 ± 0.03  | 2.57 ± 0.03  | 2.66 ± 0.03  | 2.99 ± 0.03  | <0.001         |
| Slow thinking      | 2.81 ± 0.03  | 2.40 ± 0.03  | 2.42 ± 0.03  | 2.33 ± 0.03  | <0.001         |
| Restlessness       | 1.86 ± 0.03  | 2.00 ± 0.03  | 1.95 ± 0.03  | 1.80 ± 0.03  | <0.001         |

Results are expressed as adjusted average ± standard error. Between-period comparisons performed using a mixed model taking into account repeated measures for each participant.
